# Supplementary material for: Inferior Outcome of Addition of the Aminopeptidase Inhibitor Tosedostat to Standard Intensive Treatment for Elderly Patients with AML and High Risk MDS
Source: PubMed Central journal article supplement (PMC7914531; doi:10.3390/cancers13040672), 2021-02-07
Supplement: cancers-13-00672-s001.pdf [file cancers-13-00672-s001.pdf]

**Table S1.** Risk group classification as used in HOVON 103 protocol.

| <b>Risk</b>  | <b>Definition</b>                                                                                                                  |
|--------------|------------------------------------------------------------------------------------------------------------------------------------|
| Good         | t(8;21) or AML1-ETO, WBC≤20 x 10 <sup>9</sup> /L<br>inv(16)/t(16;16) or CBF- MYH11 gene<br>MK-, CEBPA+<br>MK-, FLT3ITD-/NPM1+, CRe |
| Intermediate | t(8;21) or AML1-ETO, WBC>20 x 10 <sup>9</sup> /L<br>CN -X -Y, WBC≤100 x 10 <sup>9</sup> /L, CRe                                    |
| Poor         | CN -X -Y, WBC≤100 x 10 <sup>9</sup> /L, not CRe<br>CN -X -Y, WBC>100 x 10 <sup>9</sup> /L<br>CA, non CBF, MK-, no abn3q26, EVI1-   |
| Very Poor    | Non-CBF, MK+<br>Non-CBF, abn3q26<br>Non-CBF, EVI1+                                                                                 |

WBC: White blood cells; CRe: Early CR, after cycle 1. MK: Monosomal karyotype; CN: Normal karyotype; CA: Chromosomal abnormalities; CBF: Core-binding factor.

**Table S2.** Adverse events and maximum grade in period 1, per arm.

| <b>Arm</b>                              | <b>Standard arm (n=115)</b> |          |          |          |          |          | <b>Tosedostat 120mg arm (n=114)</b> |          |          |          |          |          |
|-----------------------------------------|-----------------------------|----------|----------|----------|----------|----------|-------------------------------------|----------|----------|----------|----------|----------|
|                                         | <b>2</b>                    |          | <b>3</b> |          | <b>4</b> |          | <b>2</b>                            |          | <b>3</b> |          | <b>4</b> |          |
| <b>CTC grade</b>                        | <b>n</b>                    | <b>%</b> | <b>n</b> | <b>%</b> | <b>n</b> | <b>%</b> | <b>n</b>                            | <b>%</b> | <b>n</b> | <b>%</b> | <b>n</b> | <b>%</b> |
| Infection and infestations              | 28                          | 24%      | 28       | 24%      | 6        | 5%       | 21                                  | 18%      | 31       | 27%      | 25       | 22%      |
| Gastrointestinal disorders              | 31                          | 27%      | 15       | 13%      | 2        | 2%       | 33                                  | 29%      | 24       | 21%      | 3        | 3%       |
| Blood and lymphatic system disorders    | 3                           | 3%       | 51       | 44%      | 2        | 2%       | 1                                   | 1%       | 43       | 38%      | 1        | 1%       |
| Metabolism and nutrition disorders      | 11                          | 10%      | 20       | 17%      | .        | .        | 13                                  | 11%      | 28       | 25%      | 3        | 3%       |
| Skin & subcutaneous tissue disorders    | 28                          | 24%      | 8        | 7%       | .        | .        | 30                                  | 26%      | 7        | 6%       | .        | .        |
| Investigations                          | 9                           | 8%       | 11       | 10%      | 3        | 3%       | 22                                  | 19%      | 9        | 8%       | 5        | 4%       |
| Respiratory thoracic & mediastinal dis  | 11                          | 10%      | 8        | 7%       | 8        | 7%       | 11                                  | 10%      | 5        | 4%       | 13       | 11%      |
| Gen. disorders & admin. site conditions | 21                          | 18%      | 4        | 3%       | 2        | 2%       | 22                                  | 19%      | 6        | 5%       | .        | .        |
| Cardiac disorders                       | 3                           | 3%       | 6        | 5%       | 4        | 3%       | 23                                  | 20%      | 8        | 7%       | 4        | 4%       |
| Vascular disorders                      | 14                          | 12%      | 5        | 4%       | 2        | 2%       | 10                                  | 9%       | 3        | 3%       | 2        | 2%       |
| Nervous system disorders                | 5                           | 4%       | 4        | 3%       | 2        | 2%       | 8                                   | 7%       | 4        | 4%       | .        | .        |
| Psychiatric disorders                   | 7                           | 6%       | 1        | 1%       | .        | .        | 7                                   | 6%       | 1        | 1%       | .        | .        |
| Renal and urinary disorders             | 4                           | 3%       | 2        | 2%       | .        | .        | 6                                   | 5%       | 3        | 3%       | 1        | 1%       |
| Immune system disorders                 | 1                           | 1%       | 1        | 1%       | .        | .        | 6                                   | 5%       | 1        | 1%       | .        | .        |
| Eye disorders                           | 5                           | 4%       | .        | .        | .        | .        | 3                                   | 3%       | .        | .        | .        | .        |
| Ear and labyrinth disorders             | 5                           | 4%       | .        | .        | .        | .        | 1                                   | 1%       | 1        | 1%       | .        | .        |
| Musculoskeletal & connective tissue dis | 5                           | 4%       | .        | .        | .        | .        | 1                                   | 1%       | .        | .        | .        | .        |
| Injury poisoning & procedural complic   | 3                           | 3%       | .        | .        | .        | .        | 1                                   | 1%       | 1        | 1%       | .        | .        |
| Hepatobiliary disorders                 | .                           | .        | .        | .        | .        | .        | .                                   | .        | 1        | 1%       | 1        | 1%       |
| Reproductive system & breast disorders  | 1                           | 1%       | .        | .        | .        | .        | .                                   | .        | .        | .        | 1        | 1%       |
| Endocrine disorders                     | .                           | .        | 1        | 1%       | .        | .        | .                                   | .        | .        | .        | .        | .        |
| Surgical and medical procedures         | 1                           | 1%       | .        | .        | .        | .        | .                                   | .        | .        | .        | .        | .        |

**Table S3.** Adverse events and maximum grade in period 2, per arm.

| <b>Arm</b> | <b>Standard (n=79)</b> | <b>Tosedostat 120 mg (n=64)</b> |
|------------|------------------------|---------------------------------|
|------------|------------------------|---------------------------------|

| CTC grade                                | 2  |     | 3  |     | 4 |    | 2  |     | 3  |     | 4 |     |
|------------------------------------------|----|-----|----|-----|---|----|----|-----|----|-----|---|-----|
|                                          | n  | %   | n  | %   | n | %  | n  | %   | n  | %   | n | %   |
| Gastrointestinal disorders               | 35 | 44% | 13 | 16% | 2 | 3% | 24 | 38% | 11 | 17% | . | .   |
| Infections and infestations              | 19 | 24% | 21 | 27% | 5 | 6% | 9  | 14% | 22 | 34% | 9 | 14% |
| Skin & subcutaneous tissue disorders     | 29 | 37% | 9  | 11% | . | .  | 24 | 38% | 2  | 3%  | . | .   |
| Blood and lymphatic system disorders     | 5  | 6%  | 23 | 29% | 2 | 3% | 1  | 2%  | 21 | 33% | . | .   |
| Metabolism and nutrition disorders       | 10 | 13% | 19 | 24% | . | .  | 4  | 6%  | 17 | 27% | . | .   |
| Investigations                           | 3  | 4%  | 12 | 15% | . | .  | 8  | 13% | 5  | 8%  | 2 | 3%  |
| Cardiac disorders                        | 6  | 8%  | 1  | 1%  | . | .  | 10 | 16% | 3  | 5%  | 2 | 3%  |
| Gen. disorders & admin. site conditions  | 5  | 6%  | 3  | 4%  | 1 | 1% | 8  | 13% | 2  | 3%  | 3 | 5%  |
| Respiratory thoracic & mediastinal dis.  | 4  | 5%  | 2  | 3%  | 1 | 1% | 6  | 9%  | 1  | 2%  | 4 | 6%  |
| Nervous system disorders                 | 7  | 9%  | 1  | 1%  | . | .  | 5  | 8%  | 2  | 3%  | 1 | 2%  |
| Vascular disorders                       | 5  | 6%  | 3  | 4%  | . | .  | 4  | 6%  | 3  | 5%  | . | .   |
| Eye disorders                            | 5  | 6%  | 1  | 1%  | . | .  | 4  | 6%  | 2  | 3%  | . | .   |
| Renal and urinary disorders              | 4  | 5%  | 2  | 3%  | . | .  | 3  | 5%  | 1  | 2%  | 1 | 2%  |
| Psychiatric disorders                    | 5  | 6%  | .  | .   | . | .  | 5  | 8%  | .  | .   | . | .   |
| Musculoskeletal & connective tissue dis. | 4  | 5%  | .  | .   | . | .  | 2  | 3%  | 1  | 2%  | . | .   |
| Hepatobiliary disorders                  | 3  | 4%  | .  | .   | 1 | 1% | .  | .   | 1  | 2%  | . | .   |
| Immune system disorders                  | 2  | 3%  | .  | .   | . | .  | 3  | 5%  | .  | .   | . | .   |
| Injury poisoning & procedural complic.   | 1  | 1%  | 1  | 1%  | . | .  | .  | .   | 2  | 3%  | . | .   |
| Neoplasms benign malignant & unspecified | 4  | 5%  | .  | .   | . | .  | .  | .   | .  | .   | . | .   |

**Table S4.** Atrial fibrillation in period 1 and 2, per arm.

|                 | Standard |     | Tosedostat 120mg |     |
|-----------------|----------|-----|------------------|-----|
|                 | n        | %   | n                | %   |
| <b>Cycle I</b>  |          |     |                  |     |
| No              | 110      | 96% | 94               | 82% |
| Yes             | 5        | 4%  | 20               | 18% |
| <b>Cycle II</b> |          |     |                  |     |
| No              | 75       | 95% | 58               | 91% |
| Yes             | 4        | 5%  | 6                | 9%  |

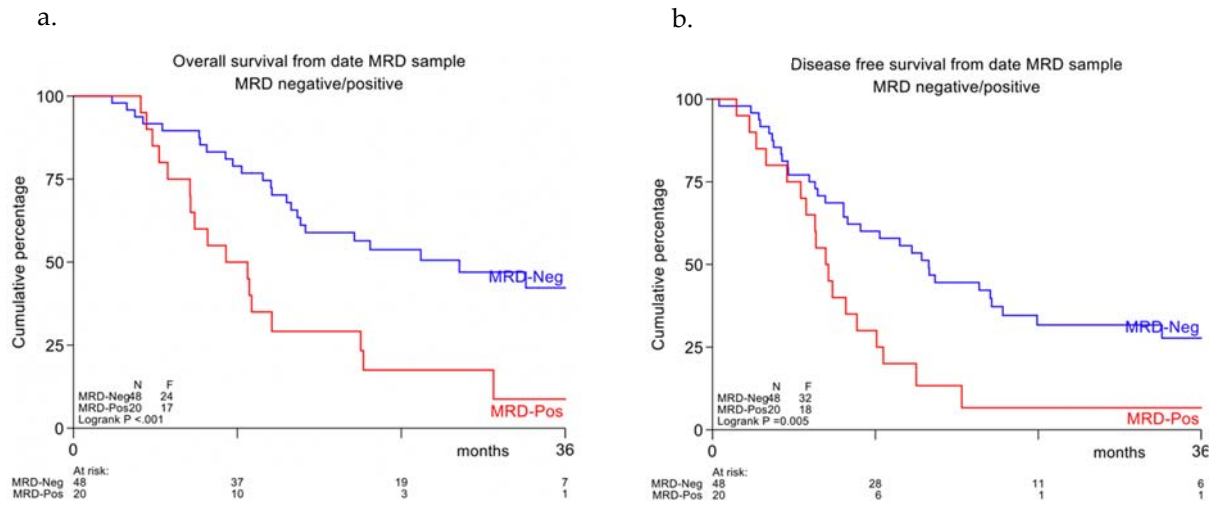

**Figure S1.** Overall survival according to MRD status after cycle 2. **b.** Disease-free survival according to MRD status after cycle 2.
